# Supplementary material for: High Impact: The Role of Promiscuous Binding Sites in Polypharmacology
Source: PubMed Central journal article supplement (PMC6680532; doi:10.3390/molecules24142529), 2019-07-10

**Table S1.** All the pocket descriptors (except the frequency of each atoms) sorted according to the average comparison test (ANOVA non parametric) between the different degree of promiscuity. The  $p$ -value range is:  $<1 \times 10^{-20}$  (\*\*\*),  $<1 \times 10^{-10}$  (\*\*),  $<5 \times 10^{-2}$  (\*) and  $>5 \times 10^{-2}$  (-). The threshold of significance has been determined with the Bonferroni correction (alpha risk divided by the number of tests). Other columns are the average and the standard deviation of the 791, 1447, 5029 and 7267 pockets from the selective, MP, HP and all the DBS from the DBS4 dataset.

| Pocket Descriptor | $p$ -value | S DBS           |                 | MP DBS |       | HP DBS |       | Total  |       |
|-------------------|------------|-----------------|-----------------|--------|-------|--------|-------|--------|-------|
|                   |            | Av <sup>1</sup> | Sd <sup>2</sup> | Av     | Sd    | Av     | Sd    | Av     | Sd    |
| SURFACE_HULL      | ***        | 538.3           | 144.1           | 596.5  | 175.9 | 679.7  | 166.6 | 647.7  | 173.6 |
| RADIUS_HULL       | ***        | 8.66            | 1.31            | 9.11   | 1.48  | 9.84   | 1.47  | 9.57   | 1.52  |
| DIAMETER_HULL     | ***        | 17.14           | 2.68            | 18.00  | 2.97  | 19.48  | 2.97  | 18.93  | 3.06  |
| VOLUME_HULL       | ***        | 1031.6          | 408.5           | 1214.6 | 538.3 | 1459.1 | 530.6 | 1363.9 | 541.6 |
| RADIUS_CYLINDER   | ***        | 8.48            | 1.35            | 8.90   | 1.49  | 9.62   | 1.49  | 9.35   | 1.54  |
| SMALLEST_SIZE     | ***        | 9.76            | 1.67            | 10.32  | 1.96  | 11.03  | 1.66  | 10.75  | 1.78  |
| C_res             | ***        | 16.62           | 4.30            | 18.14  | 5.34  | 20.12  | 5.10  | 19.34  | 5.21  |
| C_ATOM            | ***        | 72.30           | 23.08           | 79.79  | 28.23 | 91.02  | 29.46 | 86.75  | 29.36 |
| FACE              | ***        | 61.30           | 13.85           | 65.43  | 14.81 | 70.62  | 14.42 | 68.57  | 14.80 |
| p_main_chain_atom | ***        | 0.328           | 0.145           | 0.313  | 0.140 | 0.375  | 0.136 | 0.358  | 0.140 |
| p_side_chain_atom | ***        | 0.672           | 0.145           | 0.687  | 0.140 | 0.625  | 0.136 | 0.642  | 0.140 |
| X_ATOM_CONVEXE    | ***        | 0.470           | 0.079           | 0.457  | 0.080 | 0.430  | 0.079 | 0.440  | 0.081 |
| p_sulfur_atom     | ***        | 0.006           | 0.010           | 0.009  | 0.012 | 0.013  | 0.014 | 0.011  | 0.013 |
| p_O_atom          | ***        | 0.076           | 0.035           | 0.071  | 0.035 | 0.086  | 0.031 | 0.082  | 0.033 |
| hydrophobic_kyte  | ***        | -0.158          | 1.021           | -0.248 | 1.121 | 0.182  | 0.960 | 0.060  | 1.018 |
| p_Ntrp_atom       | ***        | 0.004           | 0.009           | 0.007  | 0.011 | 0.003  | 0.007 | 0.004  | 0.009 |
| polarity          | ***        | 0.146           | 0.084           | 0.138  | 0.077 | 0.171  | 0.079 | 0.161  | 0.080 |
| p_positive_res    | ***        | 0.122           | 0.094           | 0.137  | 0.093 | 0.104  | 0.075 | 0.112  | 0.082 |
| p_polar_res       | ***        | 0.536           | 0.174           | 0.549  | 0.178 | 0.487  | 0.162 | 0.504  | 0.169 |
| p_charged_res     | ***        | 0.224           | 0.135           | 0.255  | 0.148 | 0.208  | 0.112 | 0.219  | 0.124 |
| p_aliphatic_res   | ***        | 0.206           | 0.122           | 0.194  | 0.124 | 0.237  | 0.126 | 0.225  | 0.127 |
| p_Car_atom        | ***        | 0.200           | 0.111           | 0.209  | 0.129 | 0.170  | 0.118 | 0.181  | 0.121 |
| p_hydrophobic_res | ***        | 0.689           | 0.133           | 0.692  | 0.158 | 0.729  | 0.117 | 0.717  | 0.129 |
| p_ND1_atom        | ***        | 0.009           | 0.013           | 0.011  | 0.015 | 0.007  | 0.011 | 0.008  | 0.012 |
| p_S_atom          | ***        | 0.002           | 0.005           | 0.002  | 0.006 | 0.004  | 0.008 | 0.003  | 0.007 |
| p_NE2_atom        | ***        | 0.010           | 0.014           | 0.012  | 0.016 | 0.008  | 0.012 | 0.009  | 0.013 |
| p_nitrogen_atom   | ***        | 0.146           | 0.049           | 0.147  | 0.046 | 0.135  | 0.041 | 0.138  | 0.043 |
| p_aromatic_res    | ***        | 0.232           | 0.119           | 0.257  | 0.153 | 0.218  | 0.128 | 0.227  | 0.134 |
| p_Ocoo_atom       | ***        | 0.006           | 0.009           | 0.009  | 0.013 | 0.007  | 0.010 | 0.007  | 0.011 |
| p_Cgln_atom       | **         | 0.012           | 0.013           | 0.011  | 0.014 | 0.009  | 0.010 | 0.009  | 0.011 |
| p_N_atom          | **         | 0.092           | 0.042           | 0.091  | 0.038 | 0.100  | 0.039 | 0.097  | 0.039 |
| hydrophobicity    | **         | 0.033           | 0.031           | 0.030  | 0.031 | 0.038  | 0.028 | 0.036  | 0.029 |
| INERTIA_2         | **         | 0.308           | 0.054           | 0.301  | 0.045 | 0.293  | 0.049 | 0.296  | 0.049 |
| charge            | **         | 0.314           | 1.738           | 0.431  | 2.134 | -0.012 | 1.826 | 0.111  | 1.892 |
| p_Ccoo_atom       | **         | 0.016           | 0.015           | 0.018  | 0.019 | 0.015  | 0.013 | 0.015  | 0.015 |
| p_tiny_res        | **         | 0.183           | 0.103           | 0.177  | 0.117 | 0.199  | 0.111 | 0.193  | 0.111 |
| p_negative_res    | *          | 0.102           | 0.079           | 0.117  | 0.111 | 0.104  | 0.072 | 0.106  | 0.082 |
| p_Nlys_atom       | *          | 0.004           | 0.007           | 0.005  | 0.010 | 0.005  | 0.007 | 0.005  | 0.008 |
| p_C_atom          | *          | 0.166           | 0.065           | 0.155  | 0.058 | 0.164  | 0.057 | 0.163  | 0.059 |
| p_hyd_atom        | *          | 0.113           | 0.043           | 0.120  | 0.045 | 0.113  | 0.044 | 0.115  | 0.044 |
| p_oxygen_atom     | *          | 0.159           | 0.044           | 0.156  | 0.046 | 0.153  | 0.038 | 0.154  | 0.041 |
| p_Otyr_atom       | *          | 0.014           | 0.014           | 0.013  | 0.014 | 0.012  | 0.013 | 0.012  | 0.013 |

|                          |   |       |       |       |       |       |       |       |       |
|--------------------------|---|-------|-------|-------|-------|-------|-------|-------|-------|
| INERTIA_1                | * | 0.511 | 0.077 | 0.513 | 0.068 | 0.521 | 0.070 | 0.518 | 0.071 |
| p_hydrophobic_atom       | * | 0.122 | 0.042 | 0.126 | 0.045 | 0.121 | 0.044 | 0.122 | 0.044 |
| p_carbone_atom           | * | 0.676 | 0.084 | 0.681 | 0.073 | 0.686 | 0.084 | 0.684 | 0.082 |
| PCI                      | * | 0.025 | 0.012 | 0.027 | 0.013 | 0.026 | 0.012 | 0.026 | 0.012 |
| INERTIA_3                | * | 0.181 | 0.048 | 0.186 | 0.047 | 0.186 | 0.041 | 0.185 | 0.043 |
| CONV.SH_COEFF            | * | 0.978 | 0.025 | 0.976 | 0.028 | 0.978 | 0.026 | 0.978 | 0.027 |
| p_Carg_atom              | * | 0.017 | 0.015 | 0.016 | 0.015 | 0.016 | 0.017 | 0.016 | 0.016 |
| p_Ooh_atom               | * | 0.017 | 0.015 | 0.016 | 0.015 | 0.016 | 0.017 | 0.016 | 0.016 |
| PSI <sup>3</sup>         | - | 0.541 | 0.083 | 0.541 | 0.079 | 0.537 | 0.066 | 0.538 | 0.071 |
| p_small_res <sup>3</sup> | - | 0.437 | 0.132 | 0.423 | 0.137 | 0.428 | 0.143 | 0.428 | 0.141 |

<sup>1</sup> Average

<sup>2</sup> Standard deviation

<sup>3</sup> These descriptors are not significant ( $p$ -value $>5 \times 10^{-2}$ )

**Table S2.** All the ligand descriptors sorted according to the average comparison test (ANOVA non parametric) between the different degree of promiscuity. The  $p$ -value range is:  $<1 \times 10^{-10}$  (\*\*\*),  $<1 \times 10^{-5}$  (\*\*),  $<0.01$  (\*) and  $>0.01$  (-). The threshold of significance has been determined with the Bonferroni correction (alpha risk divided by the number of tests). Other columns are the average and the standard deviation of the 53, 257, 2621 and 3488 ligands from the Ligand-Clusters that respectively bind to selective, MP, HP and all the DBS from the DBS4 dataset.

| Ligand Descriptor               | $p$ -value | S DBS             |                   | MP DBS            |                   | HP DBS            |                   | Total             |                   |
|---------------------------------|------------|-------------------|-------------------|-------------------|-------------------|-------------------|-------------------|-------------------|-------------------|
|                                 |            | Av <sup>1</sup>   | Sd <sup>2</sup>   | Av                | Sd                | Av                | Sd                | Av                | Sd                |
| Rings                           | ***        | 1.11              | 0.58              | 1.91              | 1.10              | 2.27              | 0.98              | 2.22              | 1.00              |
| RigidB                          | ***        | 10.57             | 5.83              | 15.27             | 7.38              | 18.12             | 6.70              | 17.74             | 6.87              |
| HeavyAtoms                      | ***        | 16.43             | 5.70              | 21.17             | 8.09              | 23.49             | 7.46              | 23.16             | 7.57              |
| CarbonAtoms                     | ***        | 11.47             | 4.00              | 15.12             | 6.52              | 16.82             | 5.89              | 16.57             | 5.98              |
| logSw                           | ***        | -1.91             | 1.63              | -2.90             | 1.70              | -3.40             | 1.46              | -3.33             | 1.50              |
| MW                              | ***        | 241.37            | 86.35             | 309.06            | 115.39            | 337.56            | 107.03            | 333.32            | 108.44            |
| Solubility (mg/l)               | ***        | $8.2 \times 10^4$ | $1.0 \times 10^5$ | $4.6 \times 10^4$ | $9.4 \times 10^4$ | $2.5 \times 10^4$ | $5.9 \times 10^4$ | $2.8 \times 10^4$ | $6.4 \times 10^4$ |
| NumCharges                      | ***        | 1.00              | 0.94              | 0.77              | 0.73              | 0.54              | 0.71              | 0.57              | 0.72              |
| logD                            | **         | 0.05              | 2.49              | 0.49              | 2.56              | 1.40              | 2.22              | 1.29              | 2.27              |
| HBA                             | **         | 4.00              | 2.07              | 5.25              | 2.06              | 5.60              | 2.21              | 5.54              | 2.20              |
| HeteroAtoms                     | **         | 4.96              | 3.09              | 6.05              | 2.36              | 6.67              | 2.62              | 6.59              | 2.62              |
| TotalCharge                     | **         | -0.17             | 0.80              | -0.27             | 0.80              | 0.00              | 0.73              | -0.03             | 0.74              |
| logP                            | **         | 1.09              | 2.19              | 1.94              | 1.92              | 2.42              | 1.69              | 2.35              | 1.74              |
| HBD/HBA                         | **         | 5.81              | 3.08              | 7.55              | 2.78              | 7.93              | 2.99              | 7.85              | 2.99              |
| MaxSizeRing                     | **         | 7.26              | 3.79              | 7.12              | 2.92              | 7.98              | 2.69              | 7.89              | 2.75              |
| Flexibility                     | *          | 0.30              | 0.23              | 0.23              | 0.16              | 0.20              | 0.13              | 0.20              | 0.13              |
| tPSA                            | *          | 70.71             | 42.16             | 88.54             | 32.71             | 89.64             | 34.60             | 89.20             | 34.67             |
| HBD                             | *          | 1.81              | 1.29              | 2.31              | 1.25              | 2.33              | 1.32              | 2.32              | 1.31              |
| RotatableB                      | *          | 3.74              | 2.53              | 4.04              | 2.40              | 4.37              | 2.53              | 4.33              | 2.53              |
| Lipinski Violation <sup>3</sup> | -          | 0.02              | 0.14              | 0.11              | 0.35              | 0.12              | 0.38              | 0.12              | 0.37              |
| ratioH/C <sup>3</sup>           | -          | 0.46              | 0.25              | 0.45              | 0.19              | 0.43              | 0.18              | 0.43              | 0.19              |

<sup>1</sup> Average

<sup>2</sup> Standard deviation

<sup>3</sup> These descriptors are not significant ( $p$ -value $>0.01$ )

**Table S3.** All the ligands descriptors sorted according to the average comparison test (non-parametric ANOVA) between the 53 ligands from the 29 Ligand-Clusters that bind to selective DBS and the 250 ligands from the 39 Mixed Ligand-Clusters that bind to at least one selective DBS. The  $p$ -value range is:  $<1 \times 10^{-5}$  (\*\*),  $<5 \times 10^{-2}$  (\*) and  $>5 \times 10^{-2}$  (-). The threshold of significance has been determined with the Bonferroni correction (alpha risk divided by the number of tests). Other columns are the average and the standard deviation of each class of ligands.

| Ligand Descriptor               | $p$ -value | Selective DBS        |                      | Mixed                |                      |
|---------------------------------|------------|----------------------|----------------------|----------------------|----------------------|
|                                 |            | Av <sup>1</sup>      | std.dev <sup>2</sup> | Av                   | Std.dev              |
| HBD                             | **         | 1.81                 | 1.29                 | 3.11                 | 1.49                 |
| HBD/HBA                         | **         | 5.81                 | 3.08                 | 8.70                 | 3.60                 |
| HBA                             | **         | 4.00                 | 2.07                 | 5.59                 | 2.51                 |
| Rings                           | *          | 1.11                 | 0.58                 | 1.47                 | 0.76                 |
| tPSA                            | *          | 70.71                | 42.16                | 94.28                | 36.27                |
| NumCharges                      | *          | 1.00                 | 0.94                 | 0.51                 | 0.70                 |
| ratioH/C                        | *          | 0.46                 | 0.25                 | 0.59                 | 0.30                 |
| Flexibility                     | *          | 0.30                 | 0.23                 | 0.20                 | 0.17                 |
| RigidB                          | *          | 10.57                | 5.83                 | 12.72                | 6.07                 |
| HeteroAtoms                     | *          | 4.96                 | 3.09                 | 5.98                 | 2.53                 |
| RotatableB                      | *          | 3.74                 | 2.53                 | 2.93                 | 2.56                 |
| HeavyAtoms                      | *          | 16.43                | 5.70                 | 18.23                | 6.26                 |
| Lipinski.Violation <sup>3</sup> | -          | 0.02                 | 0.14                 | 0.07                 | 0.27                 |
| logD <sup>3</sup>               | -          | 0.05                 | 2.49                 | -0.66                | 2.72                 |
| MW <sup>3</sup>                 | -          | 241.37               | 86.35                | 264.92               | 87.92                |
| logP <sup>3</sup>               | -          | 1.09                 | 2.19                 | 0.52                 | 2.38                 |
| Solubility (mg/l) <sup>3</sup>  | -          | 8.23x10 <sup>4</sup> | 1.03x10 <sup>4</sup> | 1.08x10 <sup>5</sup> | 1.17x10 <sup>5</sup> |
| CarbonAtoms <sup>3</sup>        | -          | 11.47                | 4.00                 | 12.24                | 5.77                 |
| logSw <sup>3</sup>              | -          | -1.91                | 1.63                 | -1.75                | 1.79                 |
| MaxSizeRing <sup>3</sup>        | -          | 7.26                 | 3.79                 | 7.63                 | 3.89                 |
| TotalCharge <sup>3</sup>        | -          | -0.17                | 0.80                 | -0.22                | 0.73                 |

<sup>1</sup> Average

<sup>2</sup> Standard deviation

<sup>3</sup> These descriptors are not significant ( $p$ -value $>0.01$ )

**Table S4.** Repartition of the 481 DBS among the 17 MOAD protein classes represented at least once in our DBS4 dataset. The columns respectively represent the number of DBS per MOAD protein class, their proportion, the average number of pocket per DBS, the number of selective, MP and HP DBS, the number of Ligand-Clusters and the average promiscuity per DBS for each class.

| MOAD Protein Class                  | Occurrence | Prop. of class | Average number of pocket/DBS | S  | MP | HP | Number of Ligand-Cluster | Average prom. |
|-------------------------------------|------------|----------------|------------------------------|----|----|----|--------------------------|---------------|
| Transferases                        | 134        | 27.86          | 15.38                        | 18 | 36 | 80 | 741                      | 5.5           |
| Hydrolases                          | 126        | 26.2           | 15.02                        | 26 | 37 | 63 | 602                      | 4.8           |
| Oxidoreductases                     | 86         | 17.88          | 13.49                        | 22 | 40 | 24 | 243                      | 2.8           |
| Other Prot.                         | 24         | 4.99           | 11.21                        | 7  | 13 | 4  | 92                       | 3.8           |
| Lyases                              | 20         | 4.16           | 16.50                        | 5  | 8  | 7  | 117                      | 5.9           |
| Binding Prot.                       | 20         | 4.16           | 11.30                        | 9  | 10 | 1  | 24                       | 1.2           |
| Isomerases                          | 15         | 3.12           | 10.07                        | 3  | 8  | 4  | 46                       | 3.1           |
| Transcription/<br>Translation Prot. | 15         | 3.12           | 23.53                        | 2  | 3  | 10 | 97                       | 6.5           |
| Signaling Prot.                     | 13         | 2.7            | 23.38                        | 1  | 4  | 8  | 69                       | 5.3           |
| Ligases                             | 8          | 1.66           | 14.13                        | 3  | 0  | 5  | 39                       | 4.9           |
| Transport Prot.                     | 7          | 1.46           | 16.43                        | 0  | 3  | 4  | 41                       | 5.9           |
| Unclassified<br>Enzymes             | 4          | 0.83           | 9.00                         | 1  | 2  | 1  | 9                        | 2.3           |
| Folding Prot.                       | 3          | 0.62           | 57.67                        | 0  | 1  | 2  | 94                       | 31.3          |
| Immune Prot.                        | 2          | 0.42           | 5.50                         | 1  | 0  | 1  | 5                        | 2.5           |
| Mobility Prot.                      | 2          | 0.42           | 20.00                        | 1  | 0  | 1  | 12                       | 6.0           |
| Cell Cycle Prot.                    | 1          | 0.21           | 6.00                         | 0  | 1  | 0  | 2                        | 2.0           |
| Structural Prot.                    | 1          | 0.21           | 27.00                        | 1  | 0  | 0  | 1                        | 1.0           |

**Figure S5.** Network of the 39 promiscuous Ligand-Clusters in interaction with both selective and promiscuous DBS, composed of 213 DBS resulting in 262 interactions. The circles represent the 213 DBS; they are colored according to the MOAD protein class which they belong and named according to their promiscuity. The squares represent the 39 mixed Ligand-Clusters, with their number written inside. The grey lines represent the interactions between DBS and Ligand-Clusters. This network visualization is made by the igraph package.

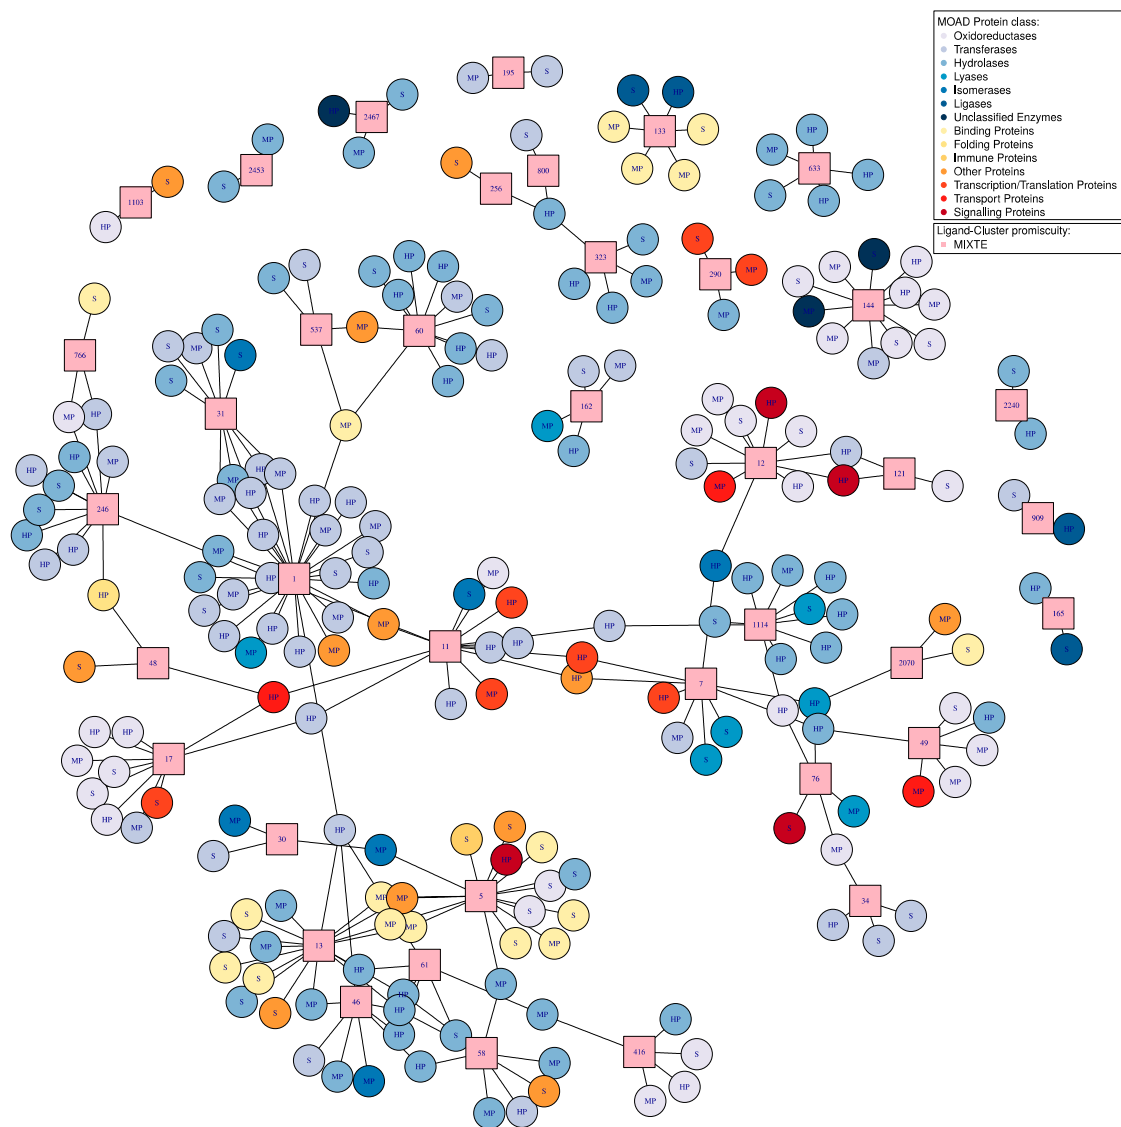

Supplement: molecules-24-02529-s001.pdf [file molecules-24-02529-s001.pdf]
